# Supplementary material
Source: MDPI journal article supplement (https://www.mdpi.com/2073-4344/13/3/605)
Supplement: s1 [file s1]

**Table S1.** Coordinates of box centers and box sizes used in the molecular docking of MPO, XO, and Keap1.

| Targets | Box center |     |    | Box size (Å) |    |    |
|---------|------------|-----|----|--------------|----|----|
|         | x          | y   | z  | x            | y  | z  |
| MPO     | -20        | -50 | 47 | 15           | 15 | 15 |
| XO      | 29         | 21  | 15 | 25           | 25 | 25 |
| Keap1   | 5          | 7   | 2  | 15           | 15 | 15 |
